# Supplementary material for: Spring phenology and phenology-climate links inferred from two remotely sensed vegetation indices across regions and biomes
Source: Copernicus journal article supplement (doi:10.5194/bg-2018-257), 2018-07-06
Supplement: Supplementary file 1 [file bg-2018-257-supplement.pdf]

Supplement Information for

Spring phenology inferred from two remotely sensed vegetation indices  
time series: confidence and uncertainty

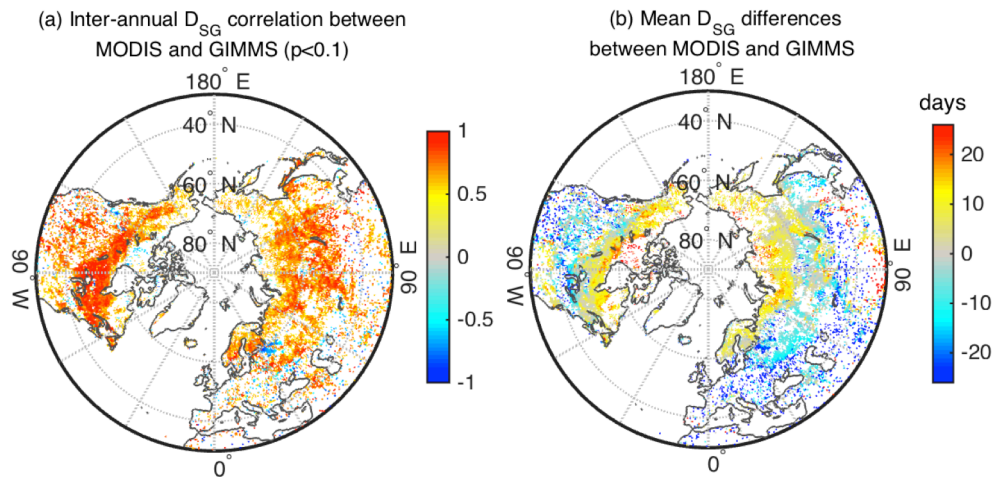

Figure S1 Correlation between MODIS and GIMMS inferred inter-annual  $D_{SG}$  over 2001-2013 ( $p < 0.1$ ) (a), and the difference between GIMMS and MODIS inferred  $\bar{D}_{SG}$  (days,  $D_{SG}^M - D_{SG}^G$ ) (b).

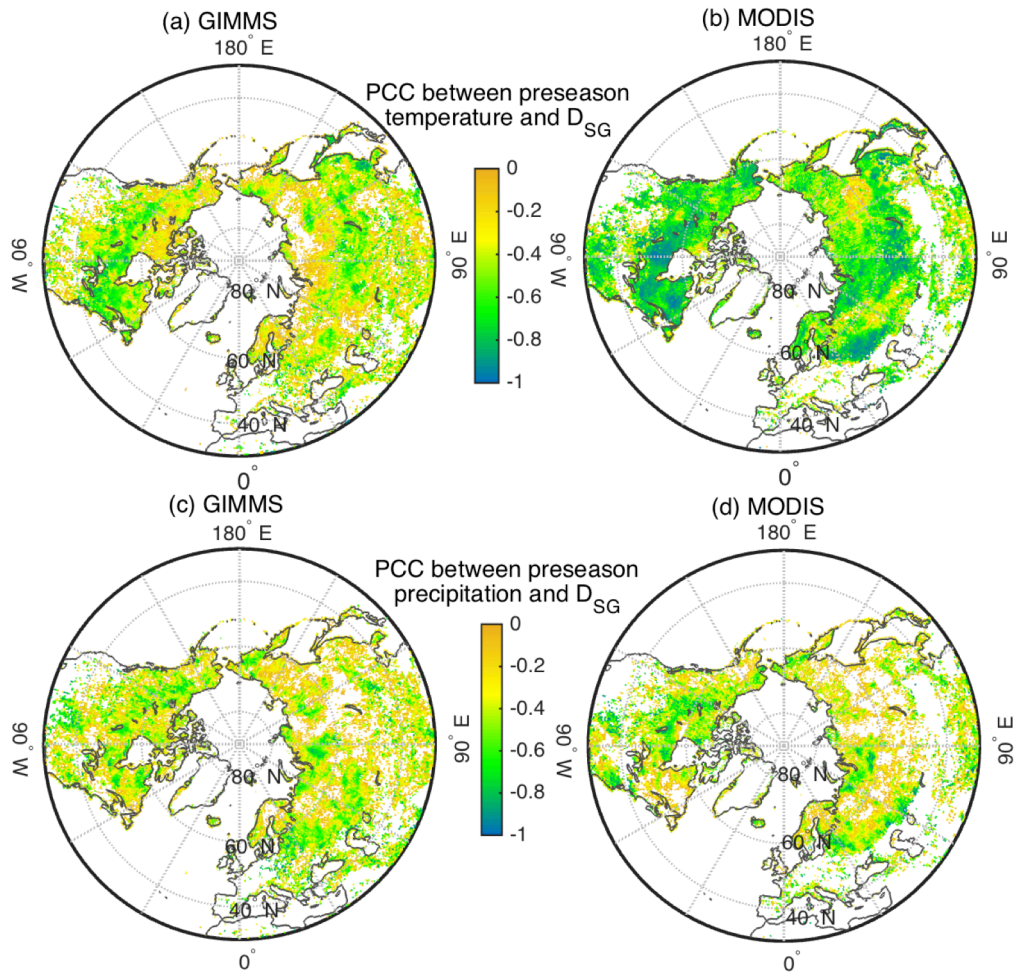

Figure S2 Pearson correlation coefficient (PCC) between pre-season temperature ( $T_m$ ) and date of spring greenup ( $D_{SG}$ ) for GIMMS (a) and MODIS(b) and Pearson correlation coefficient (PCC) between pre-season precipitation ( $P_t$ ) and date of spring greenup ( $D_{SG}$ ) for GIMMS (c) and MODIS(d).

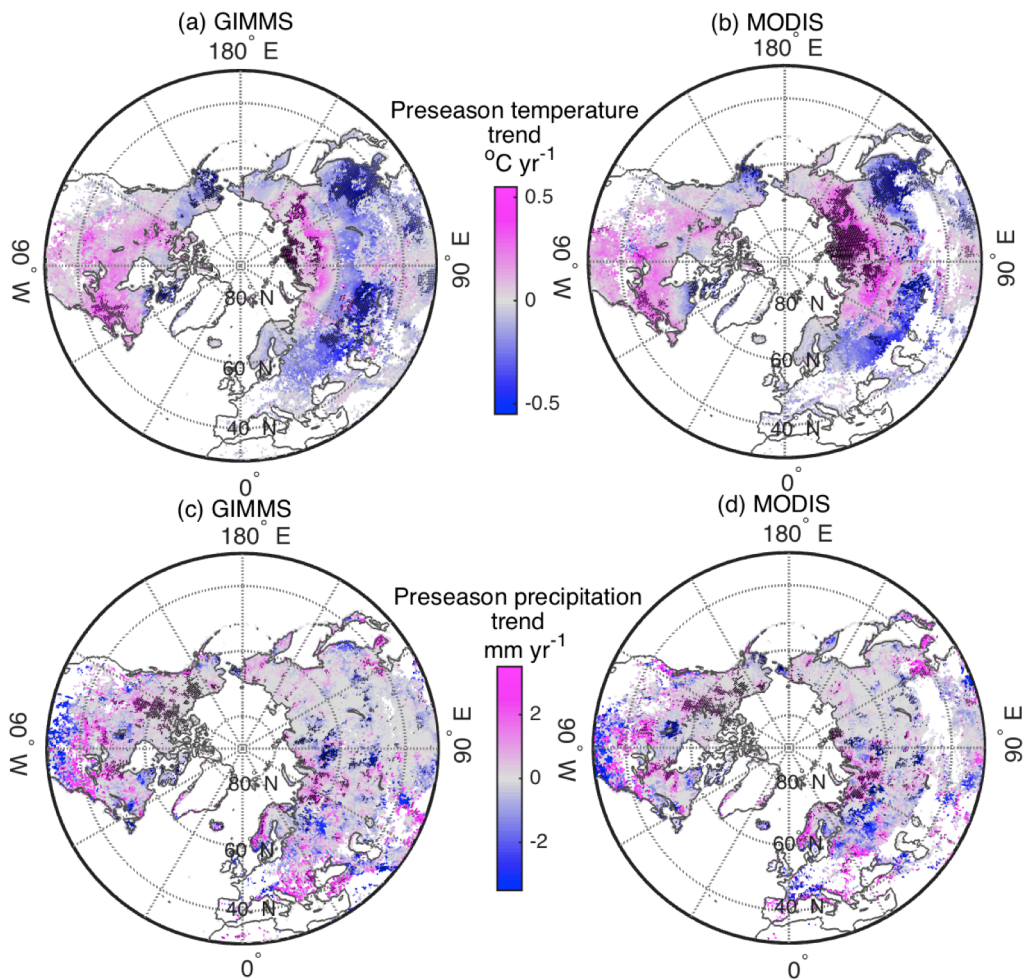

Figure S3 The pre-season temperature trend ( $^{\circ}\text{C yr}^{-1}$ ) calculated from CRUNCEP correlated to spring greenup date inferred from GIMMS (a) and MODIS (b) NDVI and precipitation trend ( $\text{mm yr}^{-1}$ ) calculated from CRUNCEP correlated to spring greenup date inferred from GIMMS (c) and MODIS (d) NDVI. The shaded regions indicate that the trend is significant ( $p < 0.1$ ).

Table S1. The number of pixels for the calculation of  $D_{SG}$  sensitivity to pre-season temperature ( $p < 0.1$ ) for each biome

| Veg. Type* | 1988-2000 | 2001-2013 |       |
|------------|-----------|-----------|-------|
|            | GIMMS     | GIMMS     | MODIS |
| ENF        | 1477      | 556       | 1677  |
| DNF        | 356       | 202       | 339   |
| DBF        | 119       | 26        | 96    |
| MF         | 2700      | 966       | 2860  |
| OS         | 4691      | 616       | 5371  |
| WS         | 1204      | 168       | 1397  |
| GLS        | 2076      | 630       | 1273  |
| GLN        | 874       | 143       | 545   |
| PW         | 327       | 95        | 330   |
| CP         | 1019      | 587       | 791   |

\*We used the IGBP land cover classification for 9 biomes in 2012: Evergreen Needleleaf Forest (ENF), Deciduous Needleleaf Forest (DNF), Deciduous Broadleaf forest (DBF), Mixed Forest (MF), Open Shrublands (OS), Woody Savannas (WS), Grassland (GL), Permanent Wetland (PW), and Cropland (CP). We distinguish the Arctic grassland to the north of 60°N (GLN), from temperate grassland in the south (GLS) due to their expected differences in climate and controls on phenology.
